# Supplementary material
Source: publisher figshare collection journal article supplement (https://tandf.figshare.com/ndownloader/files/22742327)
Supplement: Supplementary file 1 [file 22742327]

**Supplementary Material**

Synthesis, antiproliferative activity and mechanism of copper(II)-thiosemicarbazone complexes as potential anticancer and [antimicrobial](../../../../D:/Users/qijin/AppData/Local/Youdao/Dict/8.7.0.0/resultui/html/index.html" \l "/javascript:;) agents

JINXU QI, XUEJIAO WANG, TAICHEN LIU, MARTHA KANDAWA-SCHULZ, YIHONG WANG* and XINHUA ZHENG*

Table S1. Bond lengths for **C1**.

| Atom | Atom | Length/Å |  | Atom | Atom | Length/Å |
| --- | --- | --- | --- | --- | --- | --- |
| Cu1 | S1 | 2.2864(7) |  | C1 | C2 | 1.388(4) |
| Cu1 | Cl1 | 2.2243(7) |  | C1 | N1 | 1.325(3) |
| Cu1 | N2 | 1.9783(18) |  | C5 | C6 | 1.473(3) |
| Cu1 | N1 | 2.029(2) |  | C5 | C4 | 1.382(3) |
| S1 | C7 | 1.693(2) |  | C5 | N1 | 1.349(3) |
| N2 | N3 | 1.359(3) |  | C8 | C6 | 1.486(3) |
| N2 | C6 | 1.289(3) |  | C4 | C3 | 1.385(4) |
| N3 | C7 | 1.348(3) |  | C3 | C2 | 1.365(4) |
| N4 | C7 | 1.312(3) |  |  |  |  |

Table S2. Bond lengths for **C2**.

| Atom | Atom | Length/Å |  | Atom | Atom | Length/Å |
| --- | --- | --- | --- | --- | --- | --- |
| C | C6 | 1.489(4) |  | C7 | N4 | 1.316(4) |
| C1 | C2 | 1.374(5) |  | C7 | N5 | 1.332(4) |
| C1 | N1 | 1.324(4) |  | C7 | S1 | 1.732(3) |
| C2 | C3 | 1.354(5) |  | C8 | N5 | 1.441(4) |
| C3 | C4 | 1.372(5) |  | N1 | Cu1 | 2.011(3) |
| C4 | C5 | 1.374(5) |  | N3 | N4 | 1.367(3) |
| C5 | C6 | 1.463(4) |  | N3 | Cu1 | 1.948(3) |
| C5 | N1 | 1.345(4) |  | S1 | Cu1 | 2.2286(18) |
| C6 | N3 | 1.280(4) |  | Cl1 | Cu1 | 2.215(2) |

Table S3. Bond lengths for **C3**.

| Atom | Atom | Length/Å |  | Atom | Atom | Length/Å |
| --- | --- | --- | --- | --- | --- | --- |
| Cu(1) | S(1) | 2.2557(12) |  | C(1) | N(1) | 1.336(3) |
| Cu(1) | Cl(1) | 2.2243(11) |  | C(1) | C(2) | 1.381(4) |
| Cu(1) | N(2) | 1.9585(19) |  | C(5) | N(1) | 1.353(3) |
| Cu(1) | N(1) | 2.031(2) |  | C(5) | C(4) | 1.398(3) |
| S(1) | C(7) | 1.753(2) |  | C(7) | N(4) | 1.336(3) |
| N(3) | N(2) | 1.365(3) |  | N(4) | C(8) | 1.463(3) |
| N(3) | C(7) | 1.330(3) |  | N(4) | C(9) | 1.462(3) |
| C(6) | N(2) | 1.305(3) |  | C(3) | C(4) | 1.382(4) |
| C(6) | C(5) | 1.462(3) |  | C(3) | C(2) | 1.365(4) |
| C(6) | C(10) | 1.492(3) |  |  |  |  |

Table S4. Bond angles for **C1**.

| Atom | Atom | Atom | Angle/˚ |  | Atom | Atom | Atom | Angle/˚ |
| --- | --- | --- | --- | --- | --- | --- | --- | --- |
| Cl1 | Cu1 | S1 | 96.41(3) |  | N1 | C1 | C2 | 122.0(3) |
| N2 | Cu1 | S1 | 84.35(6) |  | C4 | C5 | C6 | 123.1(2) |
| N2 | Cu1 | Cl1 | 176.65(6) |  | N1 | C5 | C6 | 115.4(2) |
| N2 | Cu1 | N1 | 79.11(8) |  | N1 | C5 | C4 | 121.5(2) |
| N1 | Cu1 | S1 | 159.19(6) |  | N2 | C6 | C5 | 112.7(2) |
| N1 | Cu1 | Cl1 | 99.41(6) |  | N2 | C6 | C8 | 125.6(2) |
| C7 | S1 | Cu1 | 96.27(8) |  | C5 | C6 | C8 | 121.7(2) |
| N3 | N2 | Cu1 | 118.26(14) |  | C5 | C4 | C3 | 118.7(3) |
| C6 | N2 | Cu1 | 119.04(16) |  | C2 | C3 | C4 | 119.4(2) |
| C6 | N2 | N3 | 122.47(19) |  | C3 | C2 | C1 | 119.0(2) |
| C7 | N3 | N2 | 117.53(19) |  | C1 | N1 | Cu1 | 127.02(17) |
| N3 | C7 | S1 | 121.52(18) |  | C1 | N1 | C5 | 119.3(2) |
| N4 | C7 | S1 | 122.50(19) |  | C5 | N1 | Cu1 | 113.37(16) |
| N4 | C7 | N3 | 116.0(2) |  |  |  |  |  |

Table S5. Bond angles for **C2**.

| Atom | Atom | Atom | Angle/˚ |  | Atom | Atom | Atom | Angle/˚ |
| --- | --- | --- | --- | --- | --- | --- | --- | --- |
| N1 | C1 | C2 | 122.5(3) |  | C1 | N1 | Cu1 | 128.2(2) |
| C3 | C2 | C1 | 118.7(3) |  | C5 | N1 | Cu1 | 112.9(2) |
| C2 | C3 | C4 | 119.7(3) |  | C6 | N3 | N4 | 119.3(2) |
| C3 | C4 | C5 | 119.2(3) |  | C6 | N3 | Cu1 | 117.8(2) |
| C4 | C5 | C6 | 124.3(3) |  | N4 | N3 | Cu1 | 122.9(2) |
| N1 | C5 | C4 | 121.1(3) |  | C7 | N4 | N3 | 111.3(2) |
| N1 | C5 | C6 | 114.6(3) |  | C7 | N5 | C8 | 122.6(3) |
| C5 | C6 | C | 122.5(3) |  | C7 | S1 | Cu1 | 94.67(13) |
| N3 | C6 | C | 123.2(3) |  | N1 | Cu1 | S1 | 165.26(7) |
| N3 | C6 | C5 | 114.3(3) |  | N1 | Cu1 | Cl1 | 97.80(9) |
| N4 | C7 | N5 | 116.7(3) |  | N3 | Cu1 | N1 | 80.26(11) |
| N4 | C7 | S1 | 126.0(2) |  | N3 | Cu1 | S1 | 85.14(10) |
| N5 | C7 | S1 | 117.3(2) |  | N3 | Cu1 | Cl1 | 177.09(8) |
| C1 | N1 | C5 | 118.9(3) |  | Cl1 | Cu1 | S1 | 96.71(7) |

Table S6. Bond angles for **C3**.

| Atom | Atom | Atom | Angle/˚ |  | Atom | Atom | Atom | Angle/˚ |
| --- | --- | --- | --- | --- | --- | --- | --- | --- |
| Cl(1) | Cu(1) | S(1) | 96.99(5) |  | N(1) | C(5) | C(6) | 115.4(2) |
| N(2) | Cu(1) | S(1) | 84.23(7) |  | N(1) | C(5) | C(4) | 120.7(2) |
| N(2) | Cu(1) | Cl(1) | 177.89(6) |  | C(4) | C(5) | C(6) | 123.9(2) |
| N(2) | Cu(1) | N(1) | 80.47(8) |  | C(1) | N(1) | Cu(1) | 128.21(16) |
| N(1) | Cu(1) | S(1) | 163.62(6) |  | C(1) | N(1) | C(5) | 119.3(2) |
| N(1) | Cu(1) | Cl(1) | 98.14(7) |  | C(5) | N(1) | Cu(1) | 112.41(15) |
| C(7) | S(1) | Cu(1) | 95.55(9) |  | N(3) | C(7) | S(1) | 123.81(17) |
| C(7) | N(3) | N(2) | 112.45(18) |  | N(3) | C(7) | N(4) | 116.2(2) |
| N(2) | C(6) | C(5) | 114.19(19) |  | N(4) | C(7) | S(1) | 119.95(17) |
| N(2) | C(6) | C(10) | 122.5(2) |  | C(7) | N(4) | C(8) | 120.6(2) |
| C(5) | C(6) | C(10) | 123.3(2) |  | C(7) | N(4) | C(9) | 123.2(2) |
| N(3) | N(2) | Cu(1) | 123.56(14) |  | C(9) | N(4) | C(8) | 116.2(2) |
| C(6) | N(2) | Cu(1) | 117.52(16) |  | C(2) | C(3) | C(4) | 119.1(2) |
| C(6) | N(2) | N(3) | 118.90(18) |  | C(3) | C(4) | C(5) | 119.2(2) |
| N(1) | C(1) | C(2) | 121.9(2) |  | C(3) | C(2) | C(1) | 119.7(3) |
